# Supplementary material for: Electrochemical behavior of glycine-mediated N-doped reduced graphene oxide
Source: Royal Society of Chemistry journal article supplement (doi:10.1039/c7nj01662j), 2017-01-01
Supplement: c7nj01662j1.pdf [file c7nj01662j1.pdf]

## Electrochemical behavior of glycine-mediated N-doped reduced graphene oxide

Mahima Khandelwal and Anil Kumar\*

Department of chemistry, Indian Institute of Technology Roorkee, Roorkee-247667, India.  
E-mail: [anilkfcy@iitr.ac.in](mailto:anilkfcy@iitr.ac.in); [akmshfcy@gmail.com](mailto:akmshfcy@gmail.com)

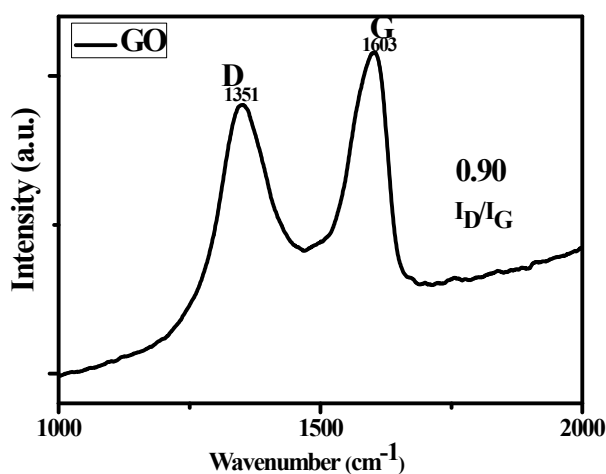

Fig. S1: Raman spectrum of GO.

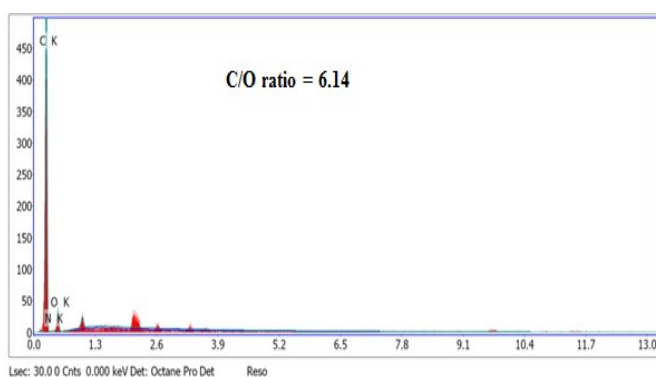

Fig. S2: EDAX spectrum of N-rGOGly.

Table S1: Raman spectral data of Graphene Oxide, N-rGOGly and N-rGOGly300

| <b>Sample(s)</b>   | <b>D band<br/>(cm<sup>-1</sup>)</b> | <b>G band<br/>(cm<sup>-1</sup>)</b> | <b>I<sub>D</sub>/I<sub>G</sub></b> |
|--------------------|-------------------------------------|-------------------------------------|------------------------------------|
| <b>GO</b>          | 1351                                | 1603                                | 0.90                               |
| <b>N-rGOGly</b>    | 1350                                | 1605 (D' 1620)                      | 1.01                               |
| <b>N-rGOGly300</b> | 1357                                | 1595 (D' 1609)                      | 0.98                               |
